# Supplementary material for: Winter Waterbird Community Composition and Use at Created Wetlands in West Virginia, USA
Source: Hindawi journal article supplement (doi:10.1155/2017/1730130), 2017-01-01
Supplement: f1 [file 1730130.f1.pdf]

**Supplementary Data Table:** Summary of monthly waterbird species use with means and standard errors at the two wetlands (PC2001 and PC2013)

in Pleasant Creek WMA, WV, from November to March 2013–2014 and 2014–2015. Individual and total species use was calculated using weekly high species counts per hectare. Bolded means are significant following the use of the sequential Bonferroni approach.

| Common Name         | Nov 2013<br>PC2001 |      | Nov 2013<br>PC2013 |      | <i>P</i> | Dec 2013<br>PC2001 |      | Dec 2013<br>PC2013 |      | <i>P</i> | Jan 2014<br>PC2001 |      | Jan 2014<br>PC2013 |      | <i>P</i> |
|---------------------|--------------------|------|--------------------|------|----------|--------------------|------|--------------------|------|----------|--------------------|------|--------------------|------|----------|
|                     | Mean               | SE   | Mean               | SE   |          | Mean               | SE   | Mean               | SE   |          | Mean               | SE   | Mean               | SE   |          |
| American Black Duck | 0.018              | 0.02 | 0.000              | 0.00 | 0.356    | ---                | ---  | ---                | ---  | ---      | 0.015              | 0.01 | 0.000              | 0.00 | 0.347    |
| American Coot       | 0.181              | 0.06 | 0.000              | 0.00 | 0.028    | ---                | ---  | ---                | ---  | ---      | 0.000              | 0.00 | 0.067              | 0.07 | 0.347    |
| American Wigeon     | ---                | ---  | ---                | ---  | ---      | ---                | ---  | ---                | ---  | ---      | ---                | ---  | ---                | ---  | ---      |
| Belted Kingfisher   | 0.018              | 0.02 | 0.000              | 0.00 | 0.356    | 0.054              | 0.03 | 0.083              | 0.08 | 0.760    | 0.044              | 0.02 | 0.000              | 0.00 | 0.040    |
| Bufflehead          | 0.708              | 0.71 | 0.000              | 0.00 | 0.356    | ---                | ---  | ---                | ---  | ---      | ---                | ---  | ---                | ---  | ---      |
| Blue-winged Teal    | ---                | ---  | ---                | ---  | ---      | 0.018              | 0.02 | 0.000              | 0.00 | 0.356    | ---                | ---  | ---                | ---  | ---      |
| Cackling Goose      | ---                | ---  | ---                | ---  | ---      | ---                | ---  | ---                | ---  | ---      | 0.015              | 0.01 | 0.000              | 0.00 | 0.347    |
| Canada Goose        | 1.034              | 0.64 | 0.000              | 0.00 | 0.156    | ---                | ---  | ---                | ---  | ---      | 1.205              | 1.20 | 0.000              | 0.00 | 0.347    |
| Canvasback          | ---                | ---  | ---                | ---  | ---      | ---                | ---  | ---                | ---  | ---      | ---                | ---  | ---                | ---  | ---      |
| Common Merganser    | ---                | ---  | ---                | ---  | ---      | ---                | ---  | ---                | ---  | ---      | ---                | ---  | ---                | ---  | ---      |
| Gadwall             | 0.218              | 0.22 | 0.000              | 0.00 | 0.356    | 1.179              | 0.33 | 0.000              | 0.00 | 0.012    | 0.015              | 0.01 | 0.000              | 0.00 | 0.347    |
| Great Egret         | ---                | ---  | ---                | ---  | ---      | ---                | ---  | ---                | ---  | ---      | ---                | ---  | ---                | ---  | ---      |
| Greater Scaup       | ---                | ---  | ---                | ---  | ---      | ---                | ---  | ---                | ---  | ---      | ---                | ---  | ---                | ---  | ---      |
| Great Blue Heron    | 0.018              | 0.02 | 0.000              | 0.00 | 0.356    | 0.054              | 0.02 | 0.083              | 0.08 | 0.746    | 0.044              | 0.03 | 0.000              | 0.00 | 0.172    |
| Green-winged Teal   | ---                | ---  | ---                | ---  | ---      | ---                | ---  | ---                | ---  | ---      | ---                | ---  | ---                | ---  | ---      |
| Horned Grebe        | ---                | ---  | ---                | ---  | ---      | ---                | ---  | ---                | ---  | ---      | ---                | ---  | ---                | ---  | ---      |
| Hooded Merganser    | 0.109              | 0.11 | 0.417              | 0.42 | 0.502    | 0.036              | 0.04 | 0.000              | 0.00 | 0.356    | 0.029              | 0.03 | 0.000              | 0.00 | 0.347    |
| Lesser Scaup        | ---                | ---  | ---                | ---  | ---      | ---                | ---  | ---                | ---  | ---      | ---                | ---  | ---                | ---  | ---      |
| Lesser Yellowlegs   | ---                | ---  | ---                | ---  | ---      | ---                | ---  | ---                | ---  | ---      | ---                | ---  | ---                | ---  | ---      |
| Mallard             | 0.218              | 0.11 | 0.000              | 0.00 | 0.088    | 0.054              | 0.05 | 0.000              | 0.00 | 0.356    | 0.000              | 0.00 | 0.400              | 0.40 | 0.347    |
| Northern Pintail    | ---                | ---  | ---                | ---  | ---      | ---                | ---  | ---                | ---  | ---      | ---                | ---  | ---                | ---  | ---      |
| Pied-billed Grebe   | 0.254              | 0.09 | 0.000              | 0.00 | 0.026    | ---                | ---  | ---                | ---  | ---      | ---                | ---  | ---                | ---  | ---      |
| Redhead             | ---                | ---  | ---                | ---  | ---      | ---                | ---  | ---                | ---  | ---      | ---                | ---  | ---                | ---  | ---      |
| Ring-necked Duck    | 0.018              | 0.02 | 0.000              | 0.00 | 0.356    | ---                | ---  | ---                | ---  | ---      | ---                | ---  | ---                | ---  | ---      |
| Ruddy Duck          | 0.018              | 0.02 | 0.000              | 0.00 | 0.356    | 0.036              | 0.02 | 0.000              | 0.00 | 0.134    | ---                | ---  | ---                | ---  | ---      |
| Tundra Swan         | 0.018              | 0.02 | 0.000              | 0.00 | 0.356    | 0.145              | 0.12 | 0.000              | 0.00 | 0.280    | ---                | ---  | ---                | ---  | ---      |
| Wood Duck           | 0.163              | 0.10 | 0.000              | 0.00 | 0.138    | ---                | ---  | ---                | ---  | ---      | 0.000              | 0.00 | 0.133              | 0.13 | 0.347    |
| Total species use   | 2.994              | 1.23 | 0.417              | 0.42 | 0.095    | 1.579              | 0.37 | 0.167              | 0.10 | 0.010    | 1.364              | 1.24 | 0.600              | 0.37 | 0.571    |

Supplementary Data Table. Continued.

| Common Name         | Feb 2014<br>PC2001 |      | Feb 2014<br>PC2013 |      | <i>P</i> | Mar 2014<br>PC2001 |             | Mar 2014<br>PC2013 |             | <i>P</i>     | Nov 2014<br>PC2001 |      | Nov 2014<br>PC2013 |      | <i>P</i> |
|---------------------|--------------------|------|--------------------|------|----------|--------------------|-------------|--------------------|-------------|--------------|--------------------|------|--------------------|------|----------|
|                     | Mean               | SE   | Mean               | SE   |          | Mean               | SE          | Mean               | SE          |              | Mean               | SE   | Mean               | SE   |          |
| American Black Duck | ---                | ---  | ---                | ---  | ---      | 0.087              | 0.05        | 0.000              | 0.00        | 0.141        | ---                | ---  | ---                | ---  | ---      |
| American Coot       | ---                | ---  | ---                | ---  | ---      | 0.087              | 0.04        | 0.000              | 0.00        | 0.074        | 0.189              | 0.07 | 0.000              | 0.00 | 0.023    |
| American Wigeon     | ---                | ---  | ---                | ---  | ---      | 0.1161             | 0.12        | 0.000              | 0.00        | 0.347        | ---                | ---  | ---                | ---  | ---      |
| Belted Kingfisher   | ---                | ---  | ---                | ---  | ---      | ---                | ---         | ---                | ---         | ---          | 0.015              | 0.01 | 0.067              | 0.07 | 0.467    |
| Bufflehead          | 0.181              | 0.14 | 0.000              | 0.00 | 0.235    | 1.118              | 0.54        | 0.000              | 0.00        | 0.071        | 0.015              | 0.01 | 0.000              | 0.00 | 0.347    |
| Blue-winged Teal    | ---                | ---  | ---                | ---  | ---      | 0.087              | 0.05        | 0.000              | 0.00        | 0.141        | ---                | ---  | ---                | ---  | ---      |
| Cackling Goose      | ---                | ---  | ---                | ---  | ---      | ---                | ---         | ---                | ---         | ---          | ---                | ---  | ---                | ---  | ---      |
| Canada Goose        | 0.671              | 0.60 | 0.167              | 0.17 | 0.449    | 2.79               | 1.03        | 0.667              | 0.00        | 0.074        | 0.073              | 0.07 | 0.000              | 0.00 | 0.347    |
| Canvasback          | 0.073              | 0.07 | 0.000              | 0.00 | 0.356    | 0.189              | 0.05        | 0.000              | 0.00        | 0.008        | ---                | ---  | ---                | ---  | ---      |
| Common Merganser    | ---                | ---  | ---                | ---  | ---      | ---                | ---         | ---                | ---         | ---          | 0.000              | 0.00 | 0.067              | 0.07 | 0.347    |
| Gadwall             | 0.109              | 0.07 | 0.000              | 0.00 | 0.168    | 0.363              | 0.17        | 0.000              | 0.00        | 0.060        | ---                | ---  | ---                | ---  | ---      |
| Great Egret         | ---                | ---  | ---                | ---  | ---      | ---                | ---         | ---                | ---         | ---          | ---                | ---  | ---                | ---  | ---      |
| Greater Scaup       | ---                | ---  | ---                | ---  | ---      | 0.160              | 0.13        | 0.000              | 0.00        | 0.243        | ---                | ---  | ---                | ---  | ---      |
| Great Blue Heron    | ---                | ---  | ---                | ---  | ---      | 0.131              | 0.10        | 0.067              | 0.07        | 0.605        | 0.087              | 0.01 | 0.067              | 0.07 | 0.772    |
| Green-winged Teal   | ---                | ---  | ---                | ---  | ---      | ---                | ---         | ---                | ---         | ---          | 0.087              | 0.09 | 0.000              | 0.00 | 0.347    |
| Horned Grebe        | ---                | ---  | ---                | ---  | ---      | 0.015              | 0.01        | 0.000              | 0.00        | 0.347        | ---                | ---  | ---                | ---  | ---      |
| Hooded Merganser    | 0.327              | 0.19 | 0.500              | 0.17 | 0.519    | 0.145              | 0.09        | 0.400              | 0.27        | 0.393        | 0.029              | 0.02 | 0.000              | 0.00 | 0.141    |
| Lesser Scaup        | ---                | ---  | ---                | ---  | ---      | 1.727              | 0.44        | 0.000              | 0.00        | 0.004        | ---                | ---  | ---                | ---  | ---      |
| Lesser Yellowlegs   | ---                | ---  | ---                | ---  | ---      | ---                | ---         | ---                | ---         | ---          | 0.044              | 0.04 | 0.000              | 0.00 | 0.347    |
| Mallard             | 0.000              | 0.00 | 0.167              | 0.17 | 0.356    | 0.319              | 0.09        | 0.133              | 0.13        | 0.287        | 0.203              | 0.1  | 0.000              | 0.00 | 0.073    |
| Northern Pintail    | 0.073              | 0.07 | 0.000              | 0.00 | 0.356    | 0.029              | 0.03        | 0.000              | 0.00        | 0.347        | ---                | ---  | ---                | ---  | ---      |
| Pied-billed Grebe   | ---                | ---  | ---                | ---  | ---      | 0.073              | 0.03        | 0.000              | 0.00        | 0.056        | 0.392              | 0.10 | 0.133              | 0.08 | 0.083    |
| Redhead             | ---                | ---  | ---                | ---  | ---      | 0.058              | 0.06        | 0.000              | 0.00        | 0.347        | ---                | ---  | ---                | ---  | ---      |
| Ring-necked Duck    | 0.290              | 0.29 | 0.000              | 0.00 | 0.356    | 2.453              | 0.79        | 0.000              | 0.00        | 0.015        | 0.015              | 0.01 | 0.000              | 0.00 | 0.347    |
| Ruddy Duck          | ---                | ---  | ---                | ---  | ---      | ---                | ---         | ---                | ---         | ---          | ---                | ---  | ---                | ---  | ---      |
| Tundra Swan         | ---                | ---  | ---                | ---  | ---      | ---                | ---         | ---                | ---         | ---          | ---                | ---  | ---                | ---  | ---      |
| Wood Duck           | ---                | ---  | ---                | ---  | ---      | 0.247              | 0.12        | 0.667              | 0.18        | 0.094        | 0.000              | 0.00 | 0.467              | 0.13 | 0.008    |
| Total species use   | 1.724              | 1.41 | 0.833              | 0.17 | 0.554    | <b>10.189</b>      | <b>1.10</b> | <b>1.933</b>       | <b>0.39</b> | <b>0.000</b> | 1.147              | 0.31 | 0.800              | 0.13 | 0.333    |

Supplementary Data Table. Continued.

|                     | Dec 2014<br>PC2001 |      | Dec 2014<br>PC2013 |      | <i>P</i> | Jan 2015<br>PC2001 |      | Jan 2015<br>PC2013 |      | <i>P</i> | Feb 2015<br>PC2001 |      | Feb 2015<br>PC2013 |      | <i>P</i> |
|---------------------|--------------------|------|--------------------|------|----------|--------------------|------|--------------------|------|----------|--------------------|------|--------------------|------|----------|
|                     | Mean               | SE   | Mean               | SE   |          | Mean               | SE   | Mean               | SE   |          | Mean               | SE   | Mean               | SE   |          |
| American Black Duck | ---                | ---  | ---                | ---  | ---      | 0.181              | 0.18 | 0.167              | 0.17 | 0.954    | 0.036              | 0.04 | 1.917              | 1.6  | 0.285    |
| American Coot       | ---                | ---  | ---                | ---  | ---      | ---                | ---  | ---                | ---  | ---      | ---                | ---  | ---                | ---  | ---      |
| American Wigeon     | ---                | ---  | ---                | ---  | ---      | ---                | ---  | ---                | ---  | ---      | ---                | ---  | ---                | ---  | ---      |
| Belted Kingfisher   | 0.087              | 0.03 | 0.000              | 0.00 | 0.012    | 0.018              | 0.02 | 0.000              | 0.00 | 0.356    | 0.018              | 0.02 | 0.083              | 0.08 | 0.474    |
| Bufflehead          | 0.276              | 0.28 | 0.133              | 0.13 | 0.654    | 0.018              | 0.02 | 0.000              | 0.00 | 0.356    | ---                | ---  | ---                | ---  | ---      |
| Blue-winged Teal    | ---                | ---  | ---                | ---  | ---      | ---                | ---  | ---                | ---  | ---      | ---                | ---  | ---                | ---  | ---      |
| Cackling Goose      | 0.029              | 0.03 | 0.000              | 0.00 | 0.347    | ---                | ---  | ---                | ---  | ---      | ---                | ---  | ---                | ---  | ---      |
| Canada Goose        | 0.755              | 0.55 | 0.000              | 0.00 | 0.207    | 0.635              | 0.63 | 0.000              | 0.00 | 0.356    | 0.000              | 0.00 | 0.167              | 0.17 | 0.356    |
| Canvasback          | ---                | ---  | ---                | ---  | ---      | ---                | ---  | ---                | ---  | ---      | ---                | ---  | ---                | ---  | ---      |
| Common Merganser    | ---                | ---  | ---                | ---  | ---      | ---                | ---  | ---                | ---  | ---      | ---                | ---  | ---                | ---  | ---      |
| Gadwall             | ---                | ---  | ---                | ---  | ---      | ---                | ---  | ---                | ---  | ---      | ---                | ---  | ---                | ---  | ---      |
| Great Egret         | ---                | ---  | ---                | ---  | ---      | ---                | ---  | ---                | ---  | ---      | ---                | ---  | ---                | ---  | ---      |
| Greater Scaup       | ---                | ---  | ---                | ---  | ---      | ---                | ---  | ---                | ---  | ---      | ---                | ---  | ---                | ---  | ---      |
| Great Blue Heron    | 0.044              | 0.02 | 0.000              | 0.00 | 0.040    | ---                | ---  | ---                | ---  | ---      | ---                | ---  | ---                | ---  | ---      |
| Green-winged Teal   | ---                | ---  | ---                | ---  | ---      | ---                | ---  | ---                | ---  | ---      | ---                | ---  | ---                | ---  | ---      |
| Horned Grebe        | ---                | ---  | ---                | ---  | ---      | ---                | ---  | ---                | ---  | ---      | ---                | ---  | ---                | ---  | ---      |
| Hooded Merganser    | 0.087              | 0.06 | 0.000              | 0.00 | 0.172    | 0.018              | 0.02 | 0.000              | 0.00 | 0.356    | 0.091              | 0.05 | 0.000              | 0.00 | 0.147    |
| Lesser Scaup        | ---                | ---  | ---                | ---  | ---      | ---                | ---  | ---                | ---  | ---      | ---                | ---  | ---                | ---  | ---      |
| Lesser Yellowlegs   | ---                | ---  | ---                | ---  | ---      | ---                | ---  | ---                | ---  | ---      | ---                | ---  | ---                | ---  | ---      |
| Mallard             | 0.116              | 0.12 | 0.000              | 0.00 | 0.347    | 0.000              | 0.00 | 0.500              | 0.50 | 0.356    | 0.290              | 0.18 | 2.500              | 1.47 | 0.186    |
| Northern Pintail    | ---                | ---  | ---                | ---  | ---      | ---                | ---  | ---                | ---  | ---      | ---                | ---  | ---                | ---  | ---      |
| Pied-billed Grebe   | 0.029              | 0.02 | 0.000              | 0.00 | 0.141    | ---                | ---  | ---                | ---  | ---      | ---                | ---  | ---                | ---  | ---      |
| Redhead             | ---                | ---  | ---                | ---  | ---      | ---                | ---  | ---                | ---  | ---      | ---                | ---  | ---                | ---  | ---      |
| Ring-necked Duck    | ---                | ---  | ---                | ---  | ---      | ---                | ---  | ---                | ---  | ---      | ---                | ---  | ---                | ---  | ---      |
| Ruddy Duck          | 0.015              | 0.01 | 0.000              | 0.00 | 0.347    | ---                | ---  | ---                | ---  | ---      | ---                | ---  | ---                | ---  | ---      |
| Tundra Swan         | ---                | ---  | ---                | ---  | ---      | ---                | ---  | ---                | ---  | ---      | ---                | ---  | ---                | ---  | ---      |
| Wood Duck           | 0.000              | 0.00 | 0.467              | 0.47 | 0.347    | ---                | ---  | ---                | ---  | ---      | ---                | ---  | ---                | ---  | ---      |
| Total species use   | 1.437              | 0.85 | 0.600              | 0.45 | 0.409    | 0.871              | 0.80 | 0.667              | 0.67 | 0.851    | 0.435              | 0.27 | 4.667              | 2.92 | 0.199    |

Supplementary Data Table. Continued.

| Common Name         | Mar 2015<br>PC2001 |             | Mar 2015<br>PC2013 |             | <i>P</i>      |
|---------------------|--------------------|-------------|--------------------|-------------|---------------|
|                     | Mean               | SE          | Mean               | SE          |               |
| American Black Duck | ---                | ---         | ---                | ---         | ---           |
| American Coot       | 0.479              | 0.16        | 0.000              | 0.00        | 0.017         |
| American Wigeon     | 0.058              | 0.04        | 0.000              | 0.00        | 0.141         |
| Belted Kingfisher   | 0.044              | 0.02        | 0.000              | 0.00        | 0.040         |
| Bufflehead          | <b>1.089</b>       | <b>0.20</b> | <b>0.000</b>       | <b>0.00</b> | <b>0.001</b>  |
| Blue-winged Teal    | 0.044              | 0.04        | 0.000              | 0.00        | 0.347         |
| Cackling Goose      | ---                | ---         | ---                | ---         | ---           |
| Canada Goose        | <b>3.498</b>       | <b>0.72</b> | <b>0.667</b>       | <b>0.00</b> | <b>0.0004</b> |
| Canvasback          | 0.189              | 0.12        | 0.000              | 0.00        | 0.143         |
| Common Merganser    | 0.058              | 0.04        | 0.000              | 0.00        | 0.141         |
| Gadwall             | 0.319              | 0.17        | 0.000              | 0.00        | 0.102         |
| Great Egret         | 0.029              | 0.03        | 0.000              | 0.00        | 0.347         |
| Greater Scaup       | 0.145              | 0.09        | 0.000              | 0.00        | 0.141         |
| Great Blue Heron    | 0.044              | 0.04        | 0.067              | 0.07        | 0.779         |
| Green-winged Teal   | 0.087              | 0.06        | 0.000              | 0.00        | 0.172         |
| Horned Grebe        | ---                | ---         | ---                | ---         | ---           |
| Hooded Merganser    | 0.044              | 0.03        | 0.400              | 0.16        | 0.064         |
| Lesser Scaup        | <b>0.639</b>       | <b>0.13</b> | <b>0.000</b>       | <b>0.00</b> | <b>0.001</b>  |
| Lesser Yellowlegs   | ---                | ---         | ---                | ---         | ---           |
| Mallard             | 0.305              | 0.03        | 0.667              | 0.37        | 0.352         |
| Northern Pintail    | ---                | ---         | ---                | ---         | ---           |
| Pied-billed Grebe   | 0.116              | 0.05        | 0.000              | 0.00        | 0.046         |
| Redhead             | 0.015              | 0.01        | 0.000              | 0.00        | 0.347         |
| Ring-necked Duck    | 2.119              | 0.96        | 0.000              | 0.00        | 0.059         |
| Ruddy Duck          | ---                | ---         | ---                | ---         | ---           |
| Tundra Swan         | ---                | ---         | ---                | ---         | ---           |
| Wood Duck           | 0.189              | 0.13        | 2.133              | 0.83        | 0.050         |
| Total species use   | 9.507              | 1.08        | 3.933              | 1.18        | 0.008         |
